# Supplementary material for: Effect of CD4+ T cell count on treatment-emergent adverse events among patients with and without HIV receiving immunotherapy for advanced cancer
Source: PubMed Central journal article supplement — J Immunother Cancer. 2022 Sep 2;10(9):e005128. doi: 10.1136/jitc-2022-005128 (PMC9442492; doi:10.1136/jitc-2022-005128), 2022-09-02
Supplement: jitc-2022-005128supp001.pdf [file jitc-2022-005128supp001.pdf]

**Supplementary table 1. Treatment-emergent adverse events related to study therapy, according to HIV status**

| Adverse event grade | HIV      | HIV      | Total    |
|---------------------|----------|----------|----------|
|                     | POSITIVE | NEGATIVE | No. (%)  |
|                     | No. (%)  | No. (%)  |          |
| 1                   | 140 (71) | 137 (67) | 277 (69) |
| 2                   | 42 (21)  | 55 (27)  | 97 (24)  |
| 3                   | 12 (6)   | 12 (6)   | 24 (6)   |
| 4                   | 3 (1.5)  | 0        | 3 (0.75) |
| 5                   | 1 (0.5)  | 0        | 1 (0.25) |
| Total               | 198      | 204      | 402      |

**Supplementary table 2. Treatment-emergent adverse events related to study therapy, according to CD4+ T-cell counts \***

| Adverse event grade | CD4      | CD4      | Total<br>No. (%) |
|---------------------|----------|----------|------------------|
|                     | count    | count    |                  |
|                     | <350     | >=350    |                  |
|                     | No. (%)  | No. (%)  |                  |
| 1                   | 137 (66) | 117 (71) | 254 (68)*        |
| 2                   | 50 (24)  | 41 (25)  | 91 (24)*         |
| 3                   | 18 (9)   | 6 (6)    | 24 (6)           |
| 4                   | 3 (1)    | 0        | 3 (0.8)          |
| 5                   | 1 (0.5)  | 0        | 1 (0.2)          |
| Total               | 209      | 164      | 373              |

\* 5 patients who experienced a total of 29 adverse events of grades 1 and 2 did not have CD4+ T cell counts recorded at baseline

Supplementary table 3. Adverse events related to treatment

| Adverse Event                        | HIV POSITIVE        |      |       |      |      |       | HIV NEGATIVE        |       |       |       |
|--------------------------------------|---------------------|------|-------|------|------|-------|---------------------|-------|-------|-------|
|                                      | Adverse Event Grade |      |       |      |      |       | Adverse Event Grade |       |       |       |
|                                      | No. (%)             |      |       |      |      |       | No. (%)             |       |       |       |
|                                      | 1                   | 2    | 3     | 4    | 5    | Total | 1                   | 2     | 3     | Total |
| Abdominal pain                       | 2                   | 1    | 1     | 0    | 0    | 4     | 0                   | 0     | 0     |       |
|                                      | 1.43                | 2.38 | 8.33  | 0.00 | 0.00 | 2.02  |                     |       |       |       |
| Acute kidney injury                  | 1                   | 0    | 0     | 0    | 0    | 1     | 0                   | 0     | 0     |       |
|                                      | 0.71                | 0.00 | 0.00  | 0.00 | 0.00 | 0.51  |                     |       |       |       |
| Adrenal insufficiency                | 0                   | 0    | 0     | 0    | 0    |       | 0                   | 2     | 0     | 2     |
|                                      |                     |      |       |      |      |       | 0.00                | 3.64  | 0.00  | 0.98  |
| Alanine aminotransferase increased   | 5                   | 1    | 0     | 0    | 0    | 6     | 0                   | 2     | 1     | 3     |
|                                      | 3.57                | 2.38 | 0.00  | 0.00 | 0.00 | 3.03  | 0.00                | 3.64  | 8.33  | 1.47  |
| Alkaline phosphatase increased       | 3                   | 2    | 0     | 0    | 0    | 5     | 0                   | 0     | 0     | 0     |
|                                      | 2.14                | 4.76 | 0.00  | 0.00 | 0.00 | 2.53  |                     |       |       |       |
| Anal hemorrhage                      | 0                   | 0    | 0     | 0    | 0    |       | 2                   | 0     | 0     | 2     |
|                                      |                     |      |       |      |      |       | 1.46                | 0.00  | 0.00  | 0.98  |
| Alopecia                             | 1                   | 0    | 0     | 0    | 0    | 1     | 0.00                | 0.00  | 0.00  |       |
|                                      | 0.71                | 0.00 | 0.00  | 0.00 | 0.00 | 0.51  |                     |       |       |       |
| Anemia                               | 6                   | 4    | 2     | 0    | 0    | 12    | 0                   | 11    | 2     | 13    |
|                                      | 4.29                | 9.52 | 16.67 | 0.00 | 0.00 | 6.06  | 0.00                | 20.00 | 16.67 | 6.37  |
| Anorexia                             | 2                   | 1    | 0     | 0    | 0    | 3     | 0                   | 1     | 0     | 1     |
|                                      | 1.43                | 2.38 | 0.00  | 0.00 | 0.00 | 1.52  | 0.00                | 1.82  | 0.00  | 0.49  |
| Arthralgia                           | 3                   | 1    | 0     | 0    | 0    | 4     | 0                   | 1     | 0     | 1     |
|                                      | 2.14                | 2.38 | 0.00  | 0.00 | 0.00 | 2.02  | 0.00                | 1.82  | 0.00  | 0.49  |
| Aspartate aminotransferase increased | 3                   | 1    | 1     | 0    | 0    | 5     | 0                   | 2     | 1     | 3     |
|                                      | 2.14                | 2.38 | 8.33  | 0.00 | 0.00 | 2.53  | 0.00                | 3.64  | 8.33  | 1.47  |
| BUN increased                        | 1                   | 0    | 0     | 0    | 0    | 1     | 0                   | 0     | 0     | 0     |
|                                      | 0.71                | 0.00 | 0.00  | 0.00 | 0.00 | 0.51  |                     |       |       |       |
| Blood bilirubin increased            | 1                   | 0    | 1     | 1    | 0    | 3     | 0                   | 0     | 0     | 0     |

|                              |      |      |      |       |        |             |      |      |      |             |
|------------------------------|------|------|------|-------|--------|-------------|------|------|------|-------------|
|                              | 0.71 | 0.00 | 8.33 | 33.33 | 0.00   | <b>1.52</b> |      |      |      |             |
| Blurred vision               | 1    | 0    | 0    | 0     | 0      | <b>1</b>    | 0    | 0    | 0    | <b>0</b>    |
|                              | 0.71 | 0.00 | 0.00 | 0.00  | 0.00   | <b>0.51</b> |      |      |      |             |
| Bullous dermatitis           | 0    | 0    | 0    | 0     | 0      |             | 1    | 0    | 0    | <b>1</b>    |
|                              |      |      |      |       |        |             | 0.73 | 0.00 | 0.00 | <b>0.49</b> |
| CD4 lymphocytes decreased    | 0    | 1    | 1    | 0     | 0      | <b>2</b>    | 0    | 0    | 0    | <b>0</b>    |
|                              | 0.00 | 2.38 | 8.33 | 0.00  | 0.00   | <b>1.01</b> |      |      |      |             |
| CO2 Decreased                | 1    | 0    | 0    | 0     | 0      | <b>1</b>    | 0    | 0    | 0    | <b>0</b>    |
|                              | 0.71 | 0.00 | 0.00 | 0.00  | 0.00   | <b>0.51</b> |      |      |      |             |
| CPK increased                | 3    | 0    | 0    | 0     | 0      | <b>3</b>    | 0    | 1    | 0    | <b>1</b>    |
|                              | 2.14 | 0.00 | 0.00 | 0.00  | 0.00   | <b>1.52</b> | 0.00 | 1.82 | 0.00 | <b>0.49</b> |
| Cardiac troponin I increased | 0    | 0    | 0    | 0     | 0      |             | 0    | 0    | 1    | <b>1</b>    |
|                              |      |      |      |       |        |             | 0.00 | 0.00 | 8.33 | <b>0.49</b> |
| Chills                       | 0    | 0    | 0    | 0     | 0      |             | 1    | 0    | 0    | <b>1</b>    |
|                              |      |      |      |       |        |             | 0.73 | 0.00 | 0.00 | <b>0.49</b> |
| Colitis                      | 0    | 0    | 0    | 0     | 0      |             | 0    | 1    | 0    | <b>1</b>    |
|                              |      |      |      |       |        |             | 0.00 | 1.82 | 0.00 | <b>0.49</b> |
| Constipation                 | 2    | 0    | 0    | 0     | 0      | <b>2</b>    | 0    | 0    | 0    | <b>0</b>    |
|                              | 1.43 | 0.00 | 0.00 | 0.00  | 0.00   | <b>1.01</b> |      |      |      |             |
| Cough                        | 3    | 0    | 0    | 0     | 0      | <b>3</b>    | 1    | 2    | 0    | <b>3</b>    |
|                              | 2.14 | 0.00 | 0.00 | 0.00  | 0.00   | <b>1.52</b> | 0.73 | 3.64 | 0.00 | <b>1.47</b> |
| Death NOS                    | 0    | 0    | 0    | 0     | 1      | <b>1</b>    | 0    | 0    | 0    | <b>0</b>    |
|                              | 0.00 | 0.00 | 0.00 | 0.00  | 100.00 | <b>0.51</b> |      |      |      |             |
| Diarrhea                     | 2    | 2    | 0    | 0     | 0      | <b>4</b>    | 3    | 2    | 0    | <b>5</b>    |
|                              | 1.43 | 4.76 | 0.00 | 0.00  | 0.00   | <b>2.02</b> | 2.19 | 3.64 | 0.00 | <b>2.45</b> |
| Dizziness                    | 2    | 0    | 0    | 0     | 0      | <b>2</b>    | 2    | 0    | 0    | <b>2</b>    |
|                              | 1.43 | 0.00 | 0.00 | 0.00  | 0.00   | <b>1.01</b> | 1.46 | 0.00 | 0.00 | <b>0.98</b> |
| Dry eye                      | 1    | 0    | 0    | 0     | 0      | <b>1</b>    | 1    | 0    | 0    | <b>1</b>    |
|                              | 0.71 | 0.00 | 0.00 | 0.00  | 0.00   | <b>0.51</b> | 0.73 | 0.00 | 0.00 | <b>0.49</b> |
| Dry mouth                    | 0    | 0    | 0    | 0     | 0      |             | 2    | 0    | 0    | <b>2</b>    |
|                              |      |      |      |       |        |             | 1.46 | 0.00 | 0.00 | <b>0.98</b> |

|                        |      |      |      |       |      |             |      |      |      |             |
|------------------------|------|------|------|-------|------|-------------|------|------|------|-------------|
| Dry skin               | 2    | 0    | 0    | 0     | 0    | <b>2</b>    | 1    | 1    | 0    | <b>2</b>    |
|                        | 1.43 | 0.00 | 0.00 | 0.00  | 0.00 | <b>1.01</b> | 0.73 | 1.82 | 0.00 | <b>0.98</b> |
| Dysphagia              | 0    | 0    | 0    | 0     | 0    |             | 1    | 0    | 0    | <b>1</b>    |
|                        |      |      |      |       |      |             | 0.73 | 0.00 | 0.00 | <b>0.49</b> |
| Dyspnea                | 0    | 1    | 0    | 1     | 0    | <b>2</b>    | 2    | 3    | 0    | <b>5</b>    |
|                        | 0.00 | 2.38 | 0.00 | 33.33 | 0.00 | <b>1.01</b> | 1.46 | 5.45 | 0.00 | <b>2.45</b> |
| Dysuria                | 1    | 0    | 0    | 0     | 0    | <b>1</b>    | 0    | 0    | 0    | <b>0</b>    |
|                        | 0.71 | 0.00 | 0.00 | 0.00  | 0.00 | <b>0.51</b> |      |      |      |             |
| Edema face             | 0    | 0    | 0    | 0     | 0    |             | 0    | 1    | 0    | <b>1</b>    |
|                        |      |      |      |       |      |             | 0.00 | 1.82 | 0.00 | <b>0.49</b> |
| Edema limbs            | 0    | 0    | 1    | 0     | 0    | <b>1</b>    | 1    | 0    | 0    | <b>1</b>    |
|                        | 0.00 | 0.00 | 8.33 | 0.00  | 0.00 | <b>0.51</b> | 0.73 | 0.00 | 0.00 | <b>0.49</b> |
| Edema trunk            | 0    | 1    | 0    | 0     | 0    | <b>1</b>    | 0    | 0    | 0    | <b>0</b>    |
|                        | 0.00 | 2.38 | 0.00 | 0.00  | 0.00 | <b>0.51</b> |      |      |      |             |
| Erythema               | 1    | 0    | 0    | 0     | 0    | <b>1</b>    | 0    | 0    | 0    | <b>0</b>    |
|                        | 0.71 | 0.00 | 0.00 | 0.00  | 0.00 | <b>0.51</b> |      |      |      |             |
| Epistaxis              | 0    | 0    | 0    | 0     | 0    |             | 11   | 1    | 0    | <b>12</b>   |
|                        |      |      |      |       |      |             | 8.03 | 1.82 | 0.00 | <b>5.88</b> |
| Facial muscle weakness | 0    | 0    | 0    | 0     | 0    |             | 0    | 1    | 0    | <b>1</b>    |
|                        |      |      |      |       |      |             | 0.00 | 1.82 | 0.00 | <b>0.49</b> |
| Facial nerve disorder  | 0    | 0    | 0    | 0     | 0    |             | 1    | 0    | 0    | <b>1</b>    |
|                        |      |      |      |       |      |             | 0.73 | 0.00 | 0.00 | <b>0.49</b> |
| Fatigue                | 13   | 1    | 0    | 0     | 0    | <b>14</b>   | 13   | 3    | 0    | <b>16</b>   |
|                        | 9.29 | 2.38 | 0.00 | 0.00  | 0.00 | <b>7.07</b> | 9.49 | 5.45 | 0.00 | <b>7.84</b> |
| Fever                  | 2    | 3    | 0    | 0     | 0    | <b>5</b>    | 0    | 0    | 0    | <b>0</b>    |
|                        | 1.43 | 7.14 | 0.00 | 0.00  | 0.00 | <b>2.53</b> |      |      |      |             |
| Flatulence             | 1    | 0    | 0    | 0     | 0    | <b>1</b>    | 2    | 0    | 0    | <b>2</b>    |
|                        | 0.71 | 0.00 | 0.00 | 0.00  | 0.00 | <b>0.51</b> | 1.46 | 0.00 | 0.00 | <b>0.98</b> |
| Flu like symptoms      |      |      |      |       |      |             | 3    | 0    | 0    | <b>3</b>    |
|                        |      |      |      |       |      |             | 2.19 | 0.00 | 0.00 | <b>1.47</b> |
| Flushing               | 0    | 0    | 0    | 0     | 0    |             | 1    | 0    | 0    | <b>1</b>    |

|                                 |      |      |      |      |      |             |      |      |      |             |
|---------------------------------|------|------|------|------|------|-------------|------|------|------|-------------|
|                                 |      |      |      |      |      |             | 0.73 | 0.00 | 0.00 | <b>0.49</b> |
| GFR Decreased                   | 0    | 1    | 0    | 0    | 0    | <b>1</b>    | 0    | 0    | 0    | <b>0</b>    |
|                                 | 0.00 | 2.38 | 0.00 | 0.00 | 0.00 | <b>0.51</b> |      |      |      |             |
| GGT increased                   | 0    | 0    | 1    | 0    | 0    | <b>1</b>    | 0    | 0    | 0    | <b>0</b>    |
|                                 | 0.00 | 0.00 | 8.33 | 0.00 | 0.00 | <b>0.51</b> |      |      |      |             |
| Gastroesophageal reflux disease | 1    | 0    | 0    | 0    | 0    | <b>1</b>    | 0    | 0    | 0    | <b>0</b>    |
|                                 | 0.71 | 0.00 | 0.00 | 0.00 | 0.00 | <b>0.51</b> |      |      |      |             |
| Genital edema                   | 0    | 1    | 0    | 0    | 0    | <b>1</b>    | 0    | 0    | 0    | <b>0</b>    |
|                                 | 0.00 | 2.38 | 0.00 | 0.00 | 0.00 | <b>0.51</b> |      |      |      |             |
| Gingival pain                   | 0    | 0    | 0    | 0    | 0    |             | 1    | 0    | 0    | <b>1</b>    |
|                                 |      |      |      |      |      |             | 0.73 | 0.00 | 0.00 | <b>0.49</b> |
| Headache                        | 3    | 0    | 0    | 0    | 0    | <b>3</b>    | 2    | 0    | 0    | <b>2</b>    |
|                                 | 2.14 | 0.00 | 0.00 | 0.00 | 0.00 | <b>1.52</b> | 1.46 | 0.00 | 0.00 | <b>0.98</b> |
| Hematuria                       | 0    | 0    | 0    | 0    | 0    |             | 3    | 0    | 1    | <b>4</b>    |
|                                 |      |      |      |      |      |             | 2.19 | 0.00 | 8.33 | <b>1.96</b> |
| Hemorrhoidal hemorrhage         | 0    | 0    | 0    | 0    | 0    |             | 2    | 0    | 0    | <b>2</b>    |
|                                 |      |      |      |      |      |             | 1.46 | 0.00 | 0.00 | <b>0.98</b> |
| Hepatic toxicity                | 0    | 1    | 0    | 0    | 0    | <b>1</b>    | 0    | 0    | 0    | <b>0</b>    |
|                                 | 0.00 | 2.38 | 0.00 | 0.00 | 0.00 | <b>0.51</b> |      |      |      |             |
| Hypercalcemia                   | 1    | 0    | 0    | 0    | 0    | <b>1</b>    | 1    | 0    | 0    | <b>1</b>    |
|                                 | 0.71 | 0.00 | 0.00 | 0.00 | 0.00 | <b>0.51</b> | 0.73 | 0.00 | 0.00 | <b>0.49</b> |
| Hyperglycemia                   | 0    | 1    | 0    | 0    | 0    | <b>1</b>    | 0    | 0    | 1    | <b>1</b>    |
|                                 | 0.00 | 2.38 | 0.00 | 0.00 | 0.00 | <b>0.51</b> | 0.00 | 0.00 | 8.33 | <b>0.49</b> |
| Hyperkalemia                    | 1    | 0    | 0    | 0    | 0    | <b>1</b>    | 0    | 0    | 0    | <b>0</b>    |
|                                 | 0.71 | 0.00 | 0.00 | 0.00 | 0.00 | <b>0.51</b> |      |      |      |             |
| Hyperthyroidism                 | 0    | 0    | 0    | 0    | 0    |             | 1    | 0    | 0    | <b>1</b>    |
|                                 |      |      |      |      |      |             | 0.73 | 0.00 | 0.00 | <b>0.49</b> |
| Hypoalbuminemia                 | 2    | 0    | 0    | 0    | 0    | <b>2</b>    | 0    | 0    | 0    | <b>0</b>    |
|                                 | 1.43 | 0.00 | 0.00 | 0.00 | 0.00 | <b>1.01</b> |      |      |      |             |
| Hypocalcemia                    | 1    | 0    | 0    | 0    | 0    | <b>1</b>    | 0    | 0    | 0    | <b>0</b>    |
|                                 | 0.71 | 0.00 | 0.00 | 0.00 | 0.00 | <b>0.51</b> |      |      |      |             |

|                                |      |       |      |      |      |             |      |       |      |             |
|--------------------------------|------|-------|------|------|------|-------------|------|-------|------|-------------|
| Hypokalemia                    | 2    | 0     | 0    | 0    | 0    | <b>2</b>    | 0    | 1     | 0    | <b>1</b>    |
|                                | 1.43 | 0.00  | 0.00 | 0.00 | 0.00 | <b>1.01</b> | 0.00 | 1.82  | 0.00 | <b>0.49</b> |
| Hyponatremia                   | 3    | 0     | 0    | 0    | 0    | <b>3</b>    | 0    | 0     | 0    | <b>0</b>    |
|                                | 2.14 | 0.00  | 0.00 | 0.00 | 0.00 | <b>1.52</b> |      |       |      |             |
| Hypophosphatemia               | 1    | 0     | 0    | 0    | 0    | <b>1</b>    | 0    | 0     | 0    | <b>0</b>    |
|                                | 0.71 | 0.00  | 0.00 | 0.00 | 0.00 | <b>0.51</b> |      |       |      |             |
| Hypothyroidism                 | 3    | 5     | 0    | 0    | 0    | <b>8</b>    | 1    | 6     | 0    | <b>7</b>    |
|                                | 2.14 | 11.90 | 0.00 | 0.00 | 0.00 | <b>4.04</b> | 0.73 | 10.91 | 0.00 | <b>3.43</b> |
| Increased CK                   | 1    | 0     | 0    | 0    | 0    | <b>1</b>    | 0    | 0     | 0    | <b>0</b>    |
|                                | 0.71 | 0.00  | 0.00 | 0.00 | 0.00 | <b>0.51</b> |      |       |      |             |
| Insomnia                       | 2    | 0     | 0    | 0    | 0    | <b>2</b>    | 1    | 2     | 0    | <b>3</b>    |
|                                | 1.43 | 0.00  | 0.00 | 0.00 | 0.00 | <b>1.01</b> | 0.73 | 3.64  | 0.00 | <b>1.47</b> |
| Intestinal stoma site bleeding | 0    | 0     | 0    | 0    | 0    |             | 1    | 0     | 0    | <b>1</b>    |
|                                |      |       |      |      |      |             | 0.73 | 0.00  | 0.00 | <b>0.49</b> |
| Libido decreased               | 0    | 0     | 0    | 0    | 0    |             | 1    | 0     | 0    | <b>1</b>    |
|                                |      |       |      |      |      |             | 0.73 | 0.00  | 0.00 | <b>0.49</b> |
| Lipase increased               | 0    | 0     | 0    | 0    | 0    |             | 0    | 0     | 1    | <b>1</b>    |
|                                |      |       |      |      |      |             | 0.00 | 0.00  | 8.33 | <b>0.49</b> |
| Localized edema                | 0    | 2     | 0    | 0    | 0    | <b>2</b>    | 0    | 0     | 0    | <b>0</b>    |
|                                | 0.00 | 4.76  | 0.00 | 0.00 | 0.00 | <b>1.01</b> |      |       |      |             |
| Loose Stool                    | 1    | 0     | 0    | 0    | 0    | <b>1</b>    | 0    | 0     | 0    | <b>0</b>    |
|                                | 0.71 | 0.00  | 0.00 | 0.00 | 0.00 | <b>0.51</b> |      |       |      |             |
| Loose Stool (Intermittent)     | 1    | 0     | 0    | 0    | 0    | <b>1</b>    | 0    | 0     | 0    | <b>0</b>    |
|                                | 0.71 | 0.00  | 0.00 | 0.00 | 0.00 | <b>0.51</b> |      |       |      |             |
| Loose Stool (intermittent)     | 1    | 0     | 0    | 0    | 0    | <b>1</b>    | 0    | 0     | 0    | <b>0</b>    |
|                                | 0.71 | 0.00  | 0.00 | 0.00 | 0.00 | <b>0.51</b> |      |       |      |             |
| Loose stool                    | 1    | 0     | 0    | 0    | 0    | <b>1</b>    | 0    | 0     | 0    | <b>0</b>    |
|                                | 0.71 | 0.00  | 0.00 | 0.00 | 0.00 | <b>0.51</b> |      |       |      |             |
| Lymphocyte count decreased     | 2    | 0     | 1    | 0    | 0    | <b>3</b>    | 1    | 1     | 0    | <b>2</b>    |
|                                | 1.43 | 0.00  | 8.33 | 0.00 | 0.00 | <b>1.52</b> | 0.73 | 1.82  | 0.00 | <b>0.98</b> |
| Metallic taste in mouth        | 1    | 0     | 0    | 0    | 0    | <b>1</b>    |      |       |      |             |

|                                                                                      |      |      |      |      |      |             |      |      |      |             |  |
|--------------------------------------------------------------------------------------|------|------|------|------|------|-------------|------|------|------|-------------|--|
|                                                                                      | 0.71 | 0.00 | 0.00 | 0.00 | 0.00 | <b>0.51</b> |      |      |      |             |  |
| Mucositis oral                                                                       | 1    | 0    | 0    | 0    | 0    | <b>1</b>    | 4    | 1    | 0    | <b>5</b>    |  |
|                                                                                      | 0.71 | 0.00 | 0.00 | 0.00 | 0.00 | <b>0.51</b> | 2.92 | 1.82 | 0.00 | <b>2.45</b> |  |
| Myalgia                                                                              | 1    | 0    | 0    | 0    | 0    | <b>1</b>    | 1    | 0    | 0    | <b>1</b>    |  |
|                                                                                      | 0.71 | 0.00 | 0.00 | 0.00 | 0.00 | <b>0.51</b> | 0.73 | 0.00 | 0.00 | <b>0.49</b> |  |
| Myocarditis                                                                          | 0    | 0    | 0    | 0    | 0    |             | 0    | 0    | 1    | <b>1</b>    |  |
|                                                                                      |      |      |      |      |      |             | 0.00 | 0.00 | 8.33 | <b>0.49</b> |  |
| Myositis                                                                             | 0    | 0    | 0    | 0    | 0    |             | 0    | 1    | 0    | <b>1</b>    |  |
|                                                                                      |      |      |      |      |      |             | 0.00 | 1.82 | 0.00 | <b>0.49</b> |  |
| Nasal congestion                                                                     | 1    | 0    | 0    | 0    | 0    | <b>1</b>    | 1    | 0    | 0    | <b>1</b>    |  |
|                                                                                      | 0.71 | 0.00 | 0.00 | 0.00 | 0.00 | <b>0.51</b> | 0.73 | 0.00 | 0.00 | <b>0.49</b> |  |
| Nausea                                                                               | 8    | 2    | 0    | 0    | 0    | <b>10</b>   | 2    | 0    | 0    | <b>2</b>    |  |
|                                                                                      | 5.71 | 4.76 | 0.00 | 0.00 | 0.00 | <b>5.05</b> | 1.46 | 0.00 | 0.00 | <b>0.98</b> |  |
| Neoplasms benign, malignant and unspecified (incl cysts and polyps) - Other, specify | 0    | 0    | 0    | 0    | 0    |             | 5    | 3    | 0    | <b>8</b>    |  |
|                                                                                      |      |      |      |      |      |             | 3.65 | 5.45 | 0.00 | <b>3.92</b> |  |
| Neutrophil count decreased                                                           | 0    | 2    | 1    | 0    | 0    | <b>3</b>    | 0    | 0    | 0    | <b>0</b>    |  |
|                                                                                      | 0.00 | 4.76 | 8.33 | 0.00 | 0.00 | <b>1.52</b> |      |      |      |             |  |
| Oral hemorrhage                                                                      | 0    | 0    | 0    | 0    | 0    |             | 12   | 0    | 0    | <b>12</b>   |  |
|                                                                                      |      |      |      |      |      |             | 8.76 | 0.00 | 0.00 | <b>5.88</b> |  |
| Pain                                                                                 | 2    | 1    | 0    | 0    | 0    | <b>3</b>    | 0    | 0    | 0    | <b>0</b>    |  |
|                                                                                      | 1.43 | 2.38 | 0.00 | 0.00 | 0.00 | <b>1.52</b> |      |      |      |             |  |
| Pain in extremity                                                                    | 1    | 1    | 0    | 0    | 0    | <b>2</b>    | 0    | 0    | 0    | <b>0</b>    |  |
|                                                                                      | 0.71 | 2.38 | 0.00 | 0.00 | 0.00 | <b>1.01</b> |      |      |      |             |  |
| Pancreatitis                                                                         | 0    | 0    | 1    | 0    | 0    | <b>1</b>    | 0    | 0    | 0    | <b>0</b>    |  |
|                                                                                      | 0.00 | 0.00 | 8.33 | 0.00 | 0.00 | <b>0.51</b> |      |      |      |             |  |
| Papulopustular rash                                                                  | 0    | 0    | 0    | 0    | 0    |             | 1    | 0    | 0    | <b>1</b>    |  |
|                                                                                      |      |      |      |      |      |             | 0.73 | 0.00 | 0.00 | <b>0.49</b> |  |
| Peripheral sensory neuropathy                                                        | 1    | 0    | 0    | 0    | 0    | <b>1</b>    | 0    | 0    | 0    | <b>0</b>    |  |
|                                                                                      | 0.71 | 0.00 | 0.00 | 0.00 | 0.00 | <b>0.51</b> |      |      |      |             |  |



|                                   |      |      |      |       |      |             |      |      |       |             |
|-----------------------------------|------|------|------|-------|------|-------------|------|------|-------|-------------|
| Platelet count decreased          | 2    | 0    | 0    | 1     | 0    | <b>3</b>    | 0    | 0    | 0     | <b>0</b>    |
|                                   | 1.43 | 0.00 | 0.00 | 33.33 | 0.00 | <b>1.52</b> |      |      |       |             |
| Pleural effusion                  | 1    | 0    | 0    | 0     | 0    | <b>1</b>    | 0    | 0    | 0     | <b>0</b>    |
|                                   | 0.71 | 0.00 | 0.00 | 0.00  | 0.00 | <b>0.51</b> |      |      |       |             |
| Pneumonitis                       | 2    | 2    | 0    | 0     | 0    | <b>4</b>    | 0    | 1    | 0     | <b>1</b>    |
|                                   | 1.43 | 4.76 | 0.00 | 0.00  | 0.00 | <b>2.02</b> | 0.00 | 1.82 | 0.00  | <b>0.49</b> |
| Proteinuria                       | 1    | 0    | 0    | 0     | 0    | <b>1</b>    | 0    | 0    | 0     | <b>0</b>    |
|                                   | 0.71 | 0.00 | 0.00 | 0.00  | 0.00 | <b>0.51</b> |      |      |       |             |
| Pruritus                          | 10   | 0    | 0    | 0     | 0    | <b>10</b>   | 12   | 2    | 0     | <b>14</b>   |
|                                   | 7.14 | 0.00 | 0.00 | 0.00  | 0.00 | <b>5.05</b> | 8.76 | 3.64 | 0.00  | <b>6.86</b> |
| Rash acneiform                    | 1    | 0    | 0    | 0     | 0    | <b>1</b>    | 12   | 1    | 0     | <b>13</b>   |
|                                   | 0.71 | 0.00 | 0.00 | 0.00  | 0.00 | <b>0.51</b> | 8.76 | 1.82 | 0.00  | <b>6.37</b> |
| Rash maculo-papular               | 5    | 1    | 0    | 0     | 0    | <b>6</b>    | 8    | 0    | 0     | <b>8</b>    |
|                                   | 3.57 | 2.38 | 0.00 | 0.00  | 0.00 | <b>3.03</b> | 5.84 | 0.00 | 0.00  | <b>3.92</b> |
| Rectal hemorrhage                 | 0    | 0    | 0    | 0     | 0    |             | 6    | 0    | 0     | <b>6</b>    |
|                                   |      |      |      |       |      |             | 4.38 | 0.00 | 0.00  | <b>2.94</b> |
| Rhinorrhea                        | 0    | 0    | 0    | 0     | 0    |             | 1    | 0    | 0     | <b>1</b>    |
|                                   |      |      |      |       |      |             | 0.73 | 0.00 | 0.00  | <b>0.49</b> |
| Skin hypopigmentation             | 1    | 0    | 0    | 0     | 0    | <b>1</b>    | 0    | 0    | 0     | <b>0</b>    |
|                                   | 0.71 | 0.00 | 0.00 | 0.00  | 0.00 | <b>0.51</b> |      |      |       |             |
| Soft tissue infection             | 0    | 1    | 1    | 0     | 0    | <b>2</b>    | 0    | 0    | 0     | <b>0</b>    |
|                                   | 0.00 | 2.38 | 8.33 | 0.00  | 0.00 | <b>1.01</b> |      |      |       |             |
| Tumor hemorrhage                  | 0    | 0    | 0    | 0     | 0    |             | 0    | 0    | 1     | <b>1</b>    |
|                                   |      |      |      |       |      |             | 0.00 | 0.00 | 8.33  | <b>0.49</b> |
| Tumor pain                        | 0    | 0    | 0    | 0     | 0    |             | 1    | 0    | 0     | <b>1</b>    |
|                                   |      |      |      |       |      |             | 0.73 | 0.00 | 0.00  | <b>0.49</b> |
| Tremor                            | 0    | 1    | 0    | 0     | 0    | <b>1</b>    | 0    | 0    | 0     | <b>0</b>    |
|                                   | 0.00 | 2.38 | 0.00 | 0.00  | 0.00 | <b>0.51</b> |      |      |       |             |
| Upper gastrointestinal hemorrhage |      |      |      |       |      |             | 0    | 0    | 2     | <b>2</b>    |
|                                   |      |      |      |       |      |             | 0.00 | 0.00 | 16.67 | <b>0.98</b> |
| Urinary tract obstruction         | 0    | 0    | 0    | 0     | 0    |             | 0    | 1    | 0     | <b>1</b>    |

|                            |               |               |               |               |               |               |               |               |               |               |
|----------------------------|---------------|---------------|---------------|---------------|---------------|---------------|---------------|---------------|---------------|---------------|
|                            |               |               |               |               |               |               | 0.00          | 1.82          | 0.00          | <b>0.49</b>   |
| Uterine hemorrhage         | 0             | 0             | 0             | 0             | 0             |               | 1             | 0             | 0             | <b>1</b>      |
|                            |               |               |               |               |               |               | 0.73          | 0.00          | 0.00          | <b>0.49</b>   |
| Vaginal hemorrhage         | 0             | 0             | 0             | 0             | 0             |               | 4             | 0             | 0             | <b>4</b>      |
|                            |               |               |               |               |               |               | 2.92          | 0.00          | 0.00          | <b>1.96</b>   |
| Vomiting                   | 3             | 0             | 0             | 0             | 0             | <b>3</b>      | 1             | 0             | 0             | <b>1</b>      |
|                            | 2.14          | 0.00          | 0.00          | 0.00          | 0.00          | <b>1.52</b>   | 0.73          | 0.00          | 0.00          | <b>0.49</b>   |
| Weight loss                | 1             | 0             | 0             | 0             | 0             | <b>1</b>      | 1             | 0             | 0             | <b>1</b>      |
|                            | 0.71          | 0.00          | 0.00          | 0.00          | 0.00          | <b>0.51</b>   | 0.73          | 0.00          | 0.00          | <b>0.49</b>   |
| White blood cell decreased | 2             | 0             | 0             | 0             | 0             | <b>2</b>      |               |               |               |               |
|                            | 1.43          | 0.00          | 0.00          | 0.00          | 0.00          | <b>1.01</b>   |               |               |               |               |
| Xeroderma                  | 1             | 0             | 0             | 0             | 0             | <b>1</b>      | 0             | 0             | 0             | <b>0</b>      |
|                            | 0.71          | 0.00          | 0.00          | 0.00          | 0.00          | <b>0.51</b>   |               |               |               |               |
| blister mouth              | 1             | 0             | 0             | 0             | 0             | <b>1</b>      | 0             | 0             | 0             | <b>0</b>      |
|                            | 0.71          | 0.00          | 0.00          | 0.00          | 0.00          | <b>0.51</b>   |               |               |               |               |
| carbon dioxide decreased   | 1             | 0             | 0             | 0             | 0             | <b>1</b>      | 0             | 0             | 0             | <b>0</b>      |
|                            | 0.71          | 0.00          | 0.00          | 0.00          | 0.00          | <b>0.51</b>   |               |               |               |               |
| night sweats               | 1             | 0             | 0             | 0             | 0             | <b>1</b>      | 0             | 0             | 0             | <b>0</b>      |
|                            | 0.71          | 0.00          | 0.00          | 0.00          | 0.00          | <b>0.51</b>   |               |               |               |               |
| runny nose                 | 1             | 0             | 0             | 0             | 0             | <b>1</b>      | 0             | 0             | 0             | <b>0</b>      |
|                            | 0.71          | 0.00          | 0.00          | 0.00          | 0.00          | <b>0.51</b>   |               |               |               |               |
| <b>Total</b>               | <b>140</b>    | <b>42</b>     | <b>12</b>     | <b>3</b>      | <b>1</b>      | <b>198</b>    | <b>137</b>    | <b>55</b>     | <b>12</b>     | <b>204</b>    |
|                            | <b>100.00</b> |

**Supplementary table 4. Clinical trials evaluating pembrolizumab and durvalumab in advanced anal, cervical, and head/neck cancers.**

| Study/Author                     | Drug          | HIV status | Tumor type                                                        | Number of participants receiving drug | Enrollment dates              | Any TEAE, n (%) | Grade $\geq 3\%$ TRAE, n (%) |
|----------------------------------|---------------|------------|-------------------------------------------------------------------|---------------------------------------|-------------------------------|-----------------|------------------------------|
| KEYNOTE-012 /Mehra et al. [1]    | Pembrolizumab | Negative   | Recurrent and/or metastatic head and neck squamous cell carcinoma | 192                                   | June 2013 – October 2014      | 123 (64%)       | 24 (13%)                     |
| KEYNOTE-040 /Cohen et al. [2]    | Pembrolizumab | Negative   | Recurrent and/or metastatic head and neck squamous cell carcinoma | 246                                   | December 2014 – May 2016      | 155 (63%)       | 33 (13%)                     |
| KEYNOTE-055 /Bauml et al. [3]    | Pembrolizumab | Negative   | Recurrent and/or metastatic head and neck squamous cell carcinoma | 171                                   | October 2014 – September 2015 | 109 (64%)       | 26 (15%)                     |
| KEYNOTE-048 /Burtneß et al. [4]  | Pembrolizumab | Negative   | Recurrent and/or metastatic head and neck squamous cell carcinoma | 300                                   | April 2015 – January 2017     | 175 (58%)*      | 51 (17%)                     |
| HAWK study / Zandberg et al. [5] | Durvalumab    | Negative   | Recurrent and/or metastatic head                                  | 112                                   | October 2014 - March 2016     | 64 (57.1%)      | 9 (8%)                       |

|                                        |               |          |                                                                   |     |                               |             |            |  |
|----------------------------------------|---------------|----------|-------------------------------------------------------------------|-----|-------------------------------|-------------|------------|--|
|                                        |               |          | and neck squamous cell carcinoma                                  |     |                               |             |            |  |
| MedImmune study 1108 /Segal et al. [6] | Durvalumab    | Negative | Recurrent and/or metastatic head and neck squamous cell carcinoma | 62  | September 2013 – October 2017 | 37 (59.7%)  | 6 (9.7%)   |  |
| EAGLE study /Ferris et al. [7]         | Durvalumab    | Negative | Recurrent and/or metastatic head and neck squamous cell carcinoma | 240 | November 2015 – July 2017     | 136 (57.4%) | 24 (10.2%) |  |
| CONDOR study /Siu et al. [8]           | Durvalumab    | Negative | Recurrent and/or metastatic head and neck squamous cell carcinoma | 67  | April 2015 – March 2016       | 41 (63.1%)  | 8 (12.3%)  |  |
| KEYNOTE-158 /Chung et al. [9]          | Pembrolizumab | Negative | Recurrent or metastatic cervical cancer                           | 98  | January 2016 – August 2016    | 64 (65.3%)  | 12 (12.2%) |  |
| KEYNOTE-158 /Marabelle et al. [10]     | Pembrolizumab | Negative | Advanced or metastatic anal squamous cell carcinoma               | 112 | March 2016 – July 2018        | 68 (61%)    | 20 (18%)   |  |

TEAE, treatment-emergent adverse events

\* TEAE of any grade with incidence  $\geq 10\%$

## REFERENCES

1. Mehra R, Seiwert TY, Gupta S, Weiss J, Gluck I, Eder JP, Burtness B, Tahara M, Keam B, Kang H *et al*: **Efficacy and safety of pembrolizumab in recurrent/metastatic head and neck squamous cell carcinoma: pooled analyses after long-term follow-up in KEYNOTE-012.** *Br J Cancer* 2018, **119**(2):153-159.
2. Cohen EEW, Soulières D, Le Tourneau C, Dinis J, Licitra L, Ahn MJ, Soria A, Machiels JP, Mach N, Mehra R *et al*: **Pembrolizumab versus methotrexate, docetaxel, or cetuximab for recurrent or metastatic head-and-neck squamous cell carcinoma (KEYNOTE-040): a randomised, open-label, phase 3 study.** *Lancet (London, England)* 2019, **393**(10167):156-167.
3. Bauml J, Seiwert TY, Pfister DG, Worden F, Liu SV, Gilbert J, Saba NF, Weiss J, Wirth L, Sukari A *et al*: **Pembrolizumab for Platinum- and Cetuximab-Refractory Head and Neck Cancer: Results From a Single-Arm, Phase II Study.** *Journal of clinical oncology : official journal of the American Society of Clinical Oncology* 2017, **35**(14):1542-1549.
4. Burtness B, Harrington KJ, Greil R, Soulières D, Tahara M, de Castro G, Psyrri A, Basté N, Neupane P, Bratland Å *et al*: **Pembrolizumab alone or with chemotherapy versus cetuximab with chemotherapy for recurrent or metastatic squamous cell carcinoma of the head and neck (KEYNOTE-048): a randomised, open-label, phase 3 study.** *The Lancet* 2019, **394**(10212):1915-1928.
5. Zandberg DP, Algazi AP, Jimeno A, Good JS, Fayette J, Bouganim N, Ready NE, Clement PM, Even C, Jang RW *et al*: **Durvalumab for recurrent or metastatic head and neck squamous cell carcinoma: Results from a single-arm, phase II study in patients with ≥25% tumour cell PD-L1 expression who have progressed on platinum-based chemotherapy.** *European journal of cancer (Oxford, England : 1990)* 2019, **107**:142-152.
6. Segal NH, Ou SI, Balmanoukian A, Fury MG, Massarelli E, Brahmer JR, Weiss J, Schöffski P, Antonia SJ, Massard C *et al*: **Safety and efficacy of durvalumab in patients with head and neck squamous cell carcinoma: results from a phase I/II expansion cohort.** *European journal of cancer (Oxford, England : 1990)* 2019, **109**:154-161.
7. Ferris RL, Haddad R, Even C, Tahara M, Dvorkin M, Ciuleanu TE, Clement PM, Mesia R, Kutukova S, Zholudeva L *et al*: **Durvalumab with or without tremelimumab in patients with recurrent or metastatic head and neck squamous cell carcinoma: EAGLE, a randomized, open-label phase III study.** *Annals of oncology : official journal of the European Society for Medical Oncology* 2020, **31**(7):942-950.
8. Siu LL, Even C, Mesía R, Remenar E, Daste A, Delord J-P, Krauss J, Saba NF, Nabell L, Ready NE *et al*: **Safety and Efficacy of Durvalumab With or Without Tremelimumab in Patients With PD-L1–Low/Negative Recurrent or Metastatic HNSCC: The Phase 2 CONDOR Randomized Clinical Trial.** *JAMA Oncology* 2019, **5**(2):195-203.
9. Chung HC, Ros W, Delord JP, Perets R, Italiano A, Shapira-Frommer R, Manzuk L, Piha-Paul SA, Xu L, Zeigenfuss S *et al*: **Efficacy and Safety of Pembrolizumab in Previously Treated Advanced Cervical Cancer: Results From the Phase II KEYNOTE-158 Study.** *Journal of clinical oncology : official journal of the American Society of Clinical Oncology* 2019, **37**(17):1470-1478.
10. Marabelle A, Cassier PA, Fakih M, Kao S, Nielsen D, Italiano A, Guren TK, van Dongen MGJ, Spencer K, Bariani GM *et al*: **Pembrolizumab for previously treated advanced anal squamous cell carcinoma: results from the non-randomised, multicohort, multicentre, phase 2 KEYNOTE-158 study.** *The lancet Gastroenterology & hepatology* 2022, **7**(5):446-454.
